# Supplementary material for: Ferroferric oxide/l-cysteine magnetic nanospheres for capturing histidine-tagged proteins
Source: Royal Society of Chemistry journal article supplement (doi:10.1039/c3tb20726a), 2013-01-01
Supplement: c3tb20726a.pdf [file c3tb20726a.pdf]

## Electronic Supplementary Information

### Ferroferric oxide /cysteine magnetic nanospheres for isolation of his-tagged proteins

Xueyan Zou,<sup>a</sup> Kun Li,<sup>b</sup> Yanbao Zhao,<sup>\*a</sup> Yu Zhang,<sup>b</sup> Binjie Li<sup>c</sup> and Chunpeng Song<sup>b</sup>

#### ESI 1 Preparation of His-tagged proteins.

The stock solution of His-tagged protein was prepared as follows: A total of 5 mL of an overnight culture was subcultured into 300 mL fresh Luria-Bertani (LB) medium (10 g Tryptone, 5 g yeast extract and 10 g NaCl per litre of solution) containing kanamycin (50 mg/L). Transformed cells were grown at 37 °C, when the optical density (OD) at 600 reached 0.5–0.8, incubating the cells at 4 °C for 5 min. Protein expression was induced with 0.2 mM isopropyl β-d-1-thiogalactopyranoside overnight at 16 °C, 200 rpm in the rocking incubator. Cells were harvested by centrifugation at 10 °C for 15 min, 4500 rpm, resuspended in binding buffer, and disrupted by sonication. Then centrifugation at 4 °C for 40 min, 14000 rpm, the clear supernatant was filtered and the soluble His-tagged proteins were in the supernatant.

The soluble His-tagged proteins were purified as follows:

1. Preparation of Ni-NTA agarose. Use a pipette to remove sufficient slurry of Ni-NTA agarose to a 10 mL tube, sediment the medium by centrifugation for 5 min, 3000 rpm, decant the supernatant, wash the agarose by adding 5 mL Binding buffer, invert to mix, sediment the medium by centrifugation for 5 min, 3000 rpm. Repeat to add Binding buffer and sediment the medium for at least 3 times.

2. Combine the agarose with the His-tagged proteins. Add the cell lysate to the prepared Ni-NTA agarose and incubate for at least 30 min, use an agitation in the horizontal rotator. Sediment the chromatography medium by centrifugation for 5 min, 3000 rpm. Decant the supernatant, wash the Ni-NTA agarose by 5 mL Binding buffer, 5 mL Washing buffer 1, 5 mL Washing buffer 2 for at least 3 times, respectively.

3. Elute the bound His-tagged proteins. Elute the bound His-tagged proteins by adding 3 mL Elution buffer per 1 mL Ni-NTA agarose. Incubate at room temperature for 5-10 min using a horizontal rotator.

Binding buffer : 20 mM Tris, 150 mM NaCl, pH 8.0.

Washing buffer 1: 5 mM imidazole, 20 mM Tris, 150 mM NaCl, pH 8.0.

Washing buffer 2: 20 mM imidazole, 20 mM Tris, 150 mM NaCl, pH 8.0.

Elution buffer: 500 mM imidazole, 20 mM Tris, 150 mM NaCl, pH 8.0.

Water and chemicals used for buffer preparation should be of high purity. All water and solution should be filtered.

## ESI 2. Concentration of His-tagged TRX washed off from different Fe<sub>3</sub>O<sub>4</sub>/Cys-Ni<sup>2+</sup> NSs.

| Fe <sub>3</sub> O <sub>4</sub> /Cys NSs | Thiol group density<br>(μmol/g) | Binding Capacity (mg/g) |
|-----------------------------------------|---------------------------------|-------------------------|
| Sample a                                | 189.59                          | 53.2                    |
| Sample b                                | 268.59                          | 44.9                    |
| Sample c                                | 309.62                          | 34.4                    |

| Protein     | Amount of Fe <sub>3</sub> O <sub>4</sub> /Cys<br>(mg) | Binding Capacity (mg/g) |
|-------------|-------------------------------------------------------|-------------------------|
| TRX protein | 3                                                     | 53.2                    |
| TRX protein | 6                                                     | 41.7                    |
| TRX protein | 12                                                    | 37.7                    |

| Amount of Fe <sub>3</sub> O <sub>4</sub> /Cys NSs<br>(mg) | Concentration imidazole<br>(mmol/L) | Binding Capacity (mg/g) |
|-----------------------------------------------------------|-------------------------------------|-------------------------|
| 3                                                         | 100                                 | 34.0                    |
| 3                                                         | 250                                 | 47.5                    |
| 3                                                         | 500                                 | 53.2                    |
| 3                                                         | 1000                                | 56.5                    |

---

| Amount of Fe <sub>3</sub> O <sub>4</sub> /Cys NSs (mg) | concentration of TRX (μg/mL) | Binding Capacity (mg/g) |
|--------------------------------------------------------|------------------------------|-------------------------|
| 3                                                      | 44                           | 48.0                    |
| 3                                                      | 88                           | 45.6                    |
| 3                                                      | 132                          | 47.9                    |
| 3                                                      | 220                          | 53.2                    |

---

---

| Amount of Fe <sub>3</sub> O <sub>4</sub> /Cys NSs (mg) | Reused times | Binding Capacity (mg/g) |
|--------------------------------------------------------|--------------|-------------------------|
| 3                                                      | 1st          | 48.2                    |
| 3                                                      | 2nd          | 51.5                    |
| 3                                                      | 3rd          | 52.1                    |
| 3                                                      | 4th          | 53.2                    |

---

---

| Amount of Fe <sub>3</sub> O <sub>4</sub> /Cys NSs (mg) | His-tagged proteins | Binding Capacity (mg/g) |
|--------------------------------------------------------|---------------------|-------------------------|
| 3                                                      | OST1                | 31.5                    |
| 3                                                      | ABI2                | 28.8                    |
| 3                                                      | TRX                 | 53.2                    |

---
